# Supplementary material
Source: PubMed Central journal article supplement (PMC1838473)

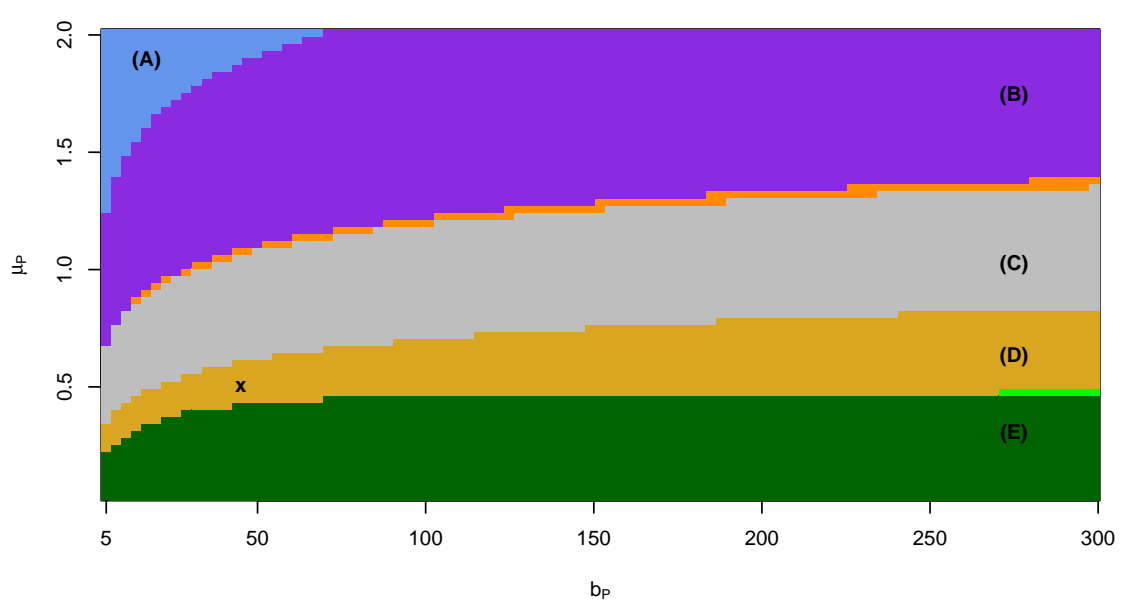

Supplement: pnas_0608573104_2.pdf [file pnas_0608573104_2.pdf]
